# Supplementary material for: Frequent upregulation of G9a promotes RelB-dependent proliferation and survival in multiple myeloma
Source: PubMed Central journal article supplement (PMC7243326; doi:10.1186/s40164-020-00164-4), 2020-05-22
Supplement: 40164_2020_164_MOESM1_ESM.pdf [file 40164_2020_164_MOESM1_ESM.pdf]

# Additional

Figure S1

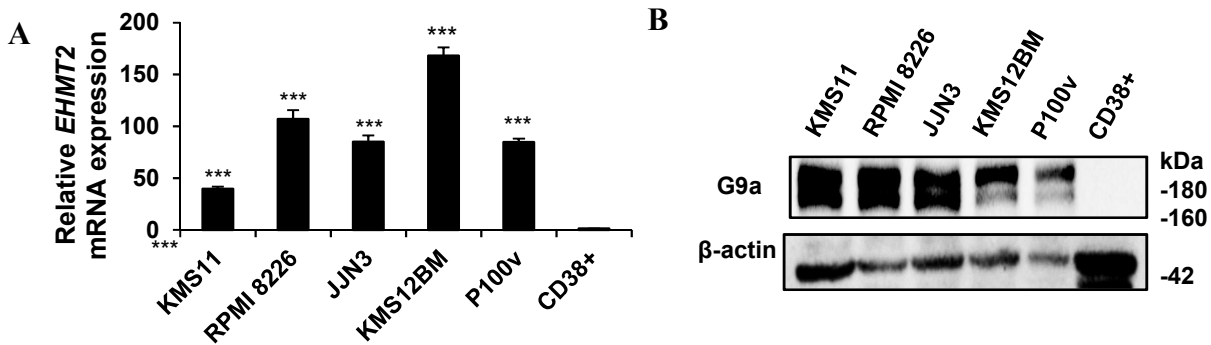

Figure S1. (A) mRNA expression of EHMT2 in multiple myeloma cell lines and CD38 positive (CD38<sup>+</sup>) PBMC. (n=3; mean  $\pm$  SD; \*\*\*p<0.001). (B) Immunoblots show G9a in MM cell lines and CD38<sup>+</sup> PBMC.

Figure S2

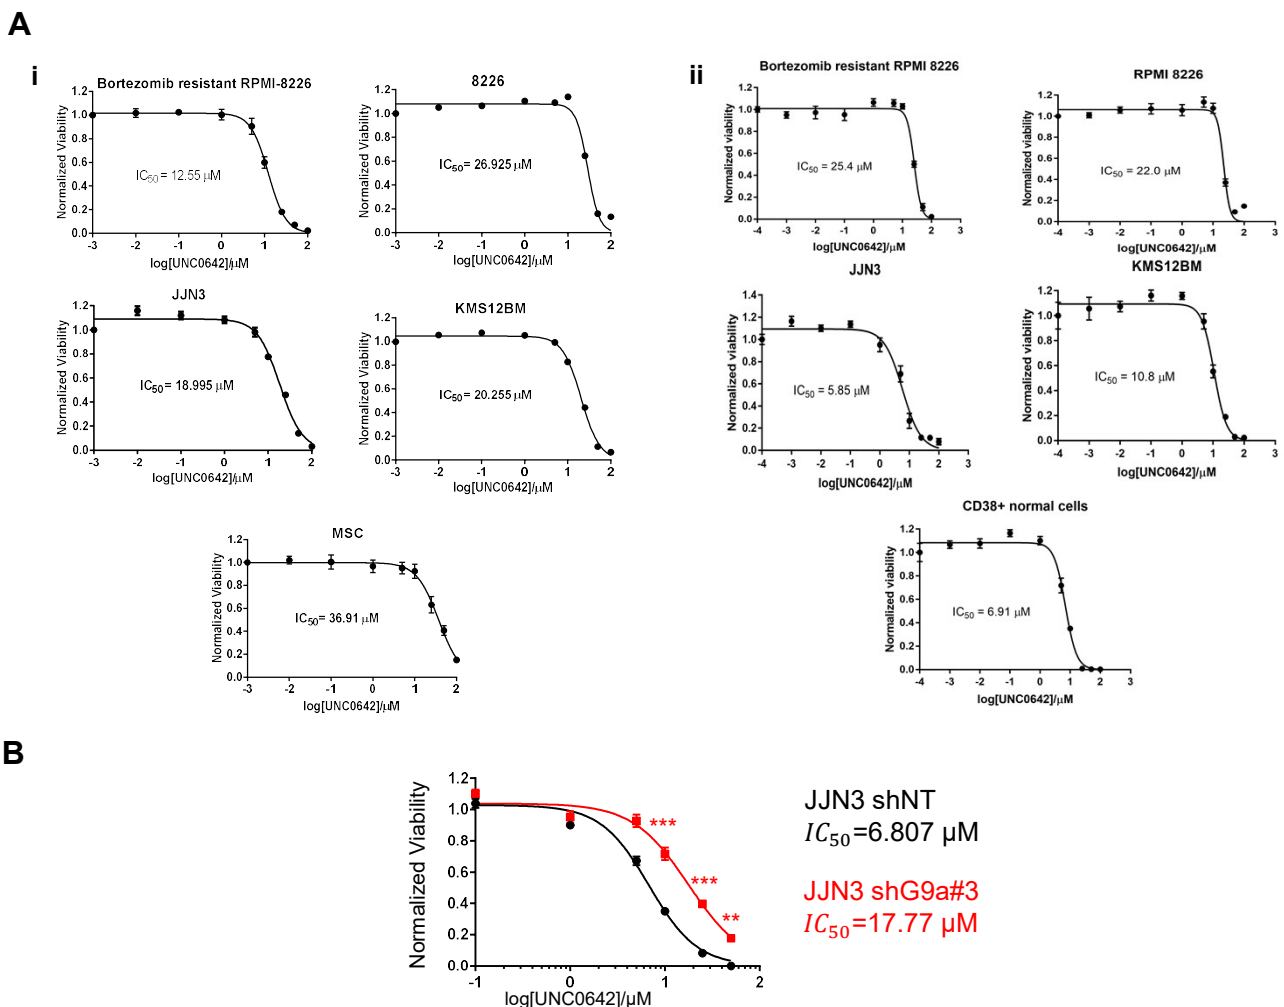

Figure S2.

(A) Dose-response curves and IC<sub>50</sub>s of UNC0642 on Bortezomib resistant RPMI-8226, RPMI-8226, JJN3, KMS12BM (i) MSC by MTS Cell Proliferation Assay and (ii) CD38<sup>+</sup> PBMC by CTG Luminescent Cell Viability Assay. Data are means  $\pm$  SD. (B) Dose-response curves and IC<sub>50</sub> of UNC0642 on JJN3 cells infected with lentiviruses expressing shNT or shG9a by CTG Luminescent Cell Viability Assay (n=6; mean  $\pm$  SD; \*\*p<0.01 and \*\*\*p<0.001).

## Figure S3

**A**

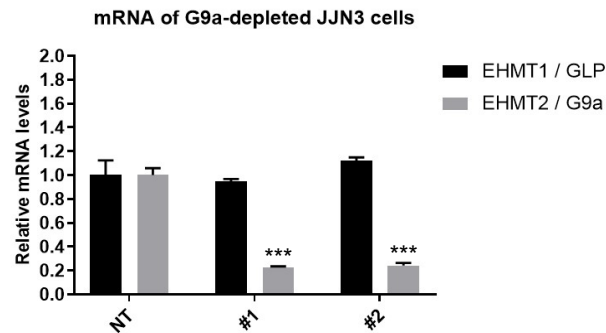

### Figure S3.

(A) mRNA expression of EHMT1 and EHMT2 in indicated MM cell lines infected with lentiviruses expressing shNT or shG9a (n = 3; mean  $\pm$  SD; \*\*\*p<0.001).

## Figure S4

**A**

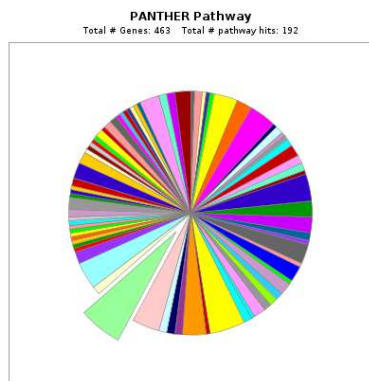

Inflammation mediated by chemokine and cytokine signaling pathway (P00031).

**B**

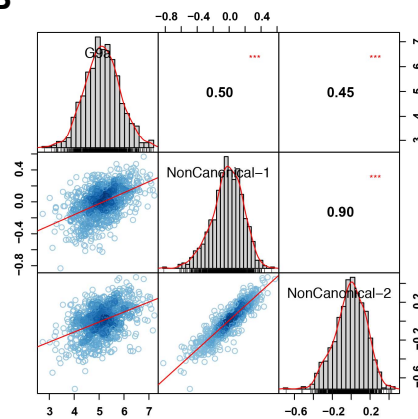

**C**

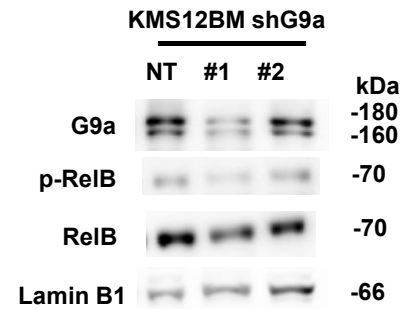

### Figure S4.

(A) Pathway analysis using PANTHER pathway database for significantly differential genes of G9a-depleted KMS12BM. (B) Correlations between G9a expression and non-canonical NF- $\kappa$ B signature indices in CoMMpass data. \*p < 0.05, \*\*p<0.01, \*\*\*p<0.001. (C) Immunoblots show G9a, p-RelB, RelB Lamin B1 as loading control in the nuclear fraction of KMS12BM infected with lentiviruses expressing shNT or shG9a.

**Table S1.** Patient characteristics by EHMT/G9a expression group

| Variable         | Top 25%     | Middle 50%   | Bottom 25%   |
|------------------|-------------|--------------|--------------|
| No. of patients  | 172         | 343          | 172          |
| Sex              |             |              |              |
| Male             | 110 (64)    | 195 (56.9)   | 105 (61)     |
| Female           | 62 (36)     | 148 (43.1)   | 67 (39)      |
| Age              |             |              |              |
| Mean (SD)        | 63.5 (9.69) | 63.9 (10.96) | 64.1 (11.55) |
| Median (Q1-Q3)   | 64 (58-70)  | 64 (57-71)   | 64 (56-72)   |
| Minimum-maximum  | 36-85       | 27-93        | 36-90        |
| Race             |             |              |              |
| Caucasian        | 137 (79.7)  | 262 (76.4)   | 134 (78.4)   |
| African-American | 24 (14)     | 57 (16.6)    | 25 (14.6)    |
| Other            | 11 (6.3)    | 24 (7)       | 12 (7)       |
| ISS stage        |             |              |              |
| I                | 55 (32.9)   | 109 (32.9)   | 52 (31.1)    |
| II               | 53 (31.7)   | 127 (38.4)   | 66 (39.5)    |
| III              | 59 (35.3)   | 95 (28.7)    | 49 (29.3)    |

**Table S2.** Patient survival characteristics by EHMT/G9a expression group

| OS (months)     | Top 25%              | Middle 50%       | Bottom 25%       |
|-----------------|----------------------|------------------|------------------|
| To event        | 50                   | 45               | 22               |
| Mean (SD)       | 13.4 (8.55)          | 14.1 (10.88)     | 17.7 (12.09)     |
| Median (Q1-Q3)  | 13 (6.7-18.5)        | 12.2 (5-19.7)    | 15.5 (8.7-25.5)  |
| Minimum-maximum | 0.4-36.5             | 0.5-48.3         | 2.1-37.8         |
| To censor       | 122 (1) <sup>1</sup> | 298 (5)          | 172 (11)         |
| Mean (SD)       | 22.8 (11.28)         | 22.8 (11.27)     | 21.4 (11.33)     |
| Median (Q1-Q3)  | 22.9 (14.6-30.2)     | 21.1 (14.1-30.6) | 21 (12.4-26.8)   |
| Minimum-maximum | -0.7-51.9            | -0.2-49.4        | 0.2-51.7         |
| PFS (months)    |                      |                  |                  |
| To event        | 81                   | 114              | 41               |
| Mean (SD)       | 13 (9)               | 15.8 (11)        | 15.5 (10.13)     |
| Median (Q1-Q3)  | 11.3 (5.6-18.2)      | 13.4 (8.4-20)    | 14.9 (7.2-23.1)  |
| Minimum-maximum | 0.4-43.7             | 0.5-47.2         | 2.1-45.4         |
| To censor       | 91 (6) <sup>1</sup>  | 229 (12)         | 131 (13)         |
| Mean (SD)       | 20.2 (10.23)         | 20.3 (10.32)     | 19.7 (10.76)     |
| Median (Q1-Q3)  | 20.5 (12.2-25.6)     | 20.2 (11.7-26.2) | 19.4 (11.4-51.6) |
| Minimum-maximum | 2.8-45.1             | 1.2-48.9         | 1.9-51.6         |

<sup>1</sup> Number of missing information cases
